1                   **Hemocyte Differentiation to the Megacyte Lineage Enhances Mosquito**  
2                                   **Immunity Against *Plasmodium***

3  
4  
5           Ana Beatriz Barletta Ferreira<sup>1</sup>, Banhisikha Saha<sup>1</sup>, Nathanie Trisnadi<sup>1#</sup>, Octavio Talyuli<sup>1,2</sup>,  
6                                   Gianmarco Raddi<sup>1#</sup>, and Carolina Barillas-Mury<sup>1\*</sup>.

7           <sup>1</sup>Laboratory of Malaria and Vector Research, National Institute of Allergy and Infectious  
8           Diseases, National Institutes of Health, Rockville, MD 20852.

9           <sup>2</sup>Instituto de Bioquímica Médica Leopoldo de Meis, Universidade Federal do Rio de Janeiro, Rio  
10           de Janeiro, Brazil.

11           <sup>#</sup> Present address: Nathanie Trisnadi, Atropos Therapeutics Inc., San Carlos, California, USA.  
12           Gianmarco Raddi, School of Clinical Medicine, University of Cambridge, Cambridge CB2 0SP,  
13           UK, CRUK Cambridge Institute, Cambridge CB2 0RE, UK.

14           \* Correspondence should be addressed to: [cbarillas@niaid.nih.gov](mailto:cbarillas@niaid.nih.gov) (CB-M)

15  
16

17 **Abstract**

18 **Silencing Cactus, a suppressor of Toll signaling, in *Anopheles gambiae*, eliminates *Plasmodium***  
19 **ookinetes by enhancing local release of hemocyte-derived microvesicles that promote activation**  
20 **of the mosquito complement-like system. We report that Cactus silencing dramatically increases**  
21 **the proportion of megacytes, a new effector hemocyte subpopulation of large granulocytes, from**  
22 **5 to 79% of circulating granulocytes. Transcriptomic and morphological analysis, as well as cell**  
23 **counts, *in situ* hybridization and expression of cell-specific markers, indicate that Cactus**  
24 **silencing triggers granulocyte differentiation into megacytes, a process mediated by the Rel1**  
25 **transcription factor of the *Toll* pathway. Megacytes are very plastic cells that can extend long**  
26 **filopodia, tend to form clusters *in vivo*, and are massively recruited to the basal midgut surface in**  
27 **response to bacterial feeding and *Plasmodium* infection. We show that hemocyte differentiation**  
28 **to the megacyte lineage greatly enhances mosquito immunity against *Plasmodium*.**

29

30 **Introduction**

31 Ookinete traversal of the *Anopheles gambiae* midgut disrupts the barriers that normally  
32 prevent bacteria of the gut microbiota from coming in direct contact with epithelial cells (Kumar  
33 et al., 2010), and this attracts hemocytes to the basal surface of the midgut (Barletta et al., 2019).  
34 *Plasmodium* ookinetes also cause irreversible damage to the cells they invade and trigger a  
35 strong caspase-mediated nitration response (Han et al., 2000, Oliveira Gde et al., 2012, Trisnadi  
36 and Barillas-Mury, 2020). When hemocytes come in contact with a nitrated midgut surface, they  
37 undergo apoptosis and release hemocyte-derived microvesicles (HdMv) (Castillo et al., 2017).  
38 Local HdMv release promotes activation of thioester containing-protein 1 (TEP1) (Castillo et al.,

39 2017), a major final effector of the mosquito complement-like system that binds to the parasite's  
40 surface and forms a complex that lyses the ookinete (Blandin et al., 2004).

41 Mosquito hemocytes are classified into three cell types, prohemocytes, oenocytoids and  
42 granulocytes, based on their morphology. However, single cell RNA sequencing (sc-RNAseq)  
43 analysis of *An. gambiae* hemocytes identified several novel subpopulations of granulocytes  
44 based on their transcriptional profiles, and defined molecular markers specific for hemocyte  
45 subpopulations (Raddi et al., 2020). Furthermore, Lineage analysis revealed that regular  
46 granulocytes derive from prohemocytes and can further differentiate into distinct cell types,  
47 including dividing granulocytes, and two final effector cells, megacytes and antimicrobial (AM)  
48 granulocytes (Raddi et al., 2020).

49 Silencing *Cactus*, a negative regulator of *Toll* signaling in *A. gambiae* mosquitoes, elicits  
50 a very strong TEP1-mediated immune response that eliminates *Plasmodium berghei* ookinetes  
51 (Frolet et al., 2006). This phenotype can be rescued by co-silencing *Cactus* with either TEP1 or  
52 the *Rel1* transcription factor, indicating that parasite elimination is mediated by activation of *Toll*  
53 signaling, with TEP1 as a final effector (Frolet et al., 2006). Later studies showed that  
54 hemocytes mediate this enhanced immune response, as transfer of *Cactus*-silenced hemocytes  
55 into naïve mosquitoes recapitulates the phenotype of systemic *Cactus* silencing (Ramirez et al.,  
56 2014). Furthermore, *cactus* silencing also increases HdMv release in response to ookinete midgut  
57 invasion (Castillo et al., 2017), indicating that hemocytes are more reactive to *Plasmodium*  
58 infection. However, the nature of the functional changes in *Cactus*-silenced hemocytes that  
59 enhance immunity against *Plasmodium* are not known. Here, we explore the effect of *Cactus*  
60 silencing on circulating hemocyte populations and their response to infection of mosquitoes with  
61 bacteria and *Plasmodium*.

62

## 63 **Results**

### 64 **Effect of Cactus-silencing on mRNA markers of granulocyte populations.**

65         The effect of silencing Cactus, a suppressor of Toll signaling, on hemocyte differentiation  
66 was explored. Hemocytes that adhere to glass (mostly granulocytes) or that remain in suspension  
67 (mostly prohemocytes and oenocytoids) were collected 4 days post-injection from *dsLacZ*  
68 control and *dsCactus*-injected females. Bulk sequencing of cDNA libraries generated between  
69 16.2 and 25.3 million fragments that mapped to the *Anopheles gambiae* AgamP4.9  
70 transcriptome. Only transcripts with 10 or more reads were included in the analysis, resulting in  
71 a total of 9,421 unique transcripts ([https://www.ebi.ac.uk/biostudies/arrayexpress/studies/E-](https://www.ebi.ac.uk/biostudies/arrayexpress/studies/E-MTAB-11252)  
72 [MTAB-11252](https://www.ebi.ac.uk/biostudies/arrayexpress/studies/E-MTAB-11252)). Glass-bound and unbound hemocyte samples were analyzed together, because  
73 the differences in expression between *dsLacZ* vs. *dsCactus*-silenced hemocytes explained 81% of  
74 the variance between the four experimental groups (Fig. S1A and S1B). Differential expression  
75 (DE) analysis of *Cactus*-silenced hemocytes using the DESeq2 software identified 1071  
76 differentially expressed genes (Q-value < 0.001), of which 407 were upregulated (log2 fold  
77 change >2), while 664 were downregulated (log2 fold change < -2) (Fig 1A).

78         The effect of Cactus silencing on expression of the transcripts that define the different  
79 hemocyte clusters established by (sc-RNAseq) (Raddi et al., 2020) was analyzed (Tables S1 and  
80 S2), to establish whether there was a significant effect on the relative abundance of **specific**  
81 **hemocyte subpopulations**. Overall, 23 oenocytoid markers, 2 from prohemocytes and 57 from  
82 granulocytes were differentially expressed between *dsLacZ* and *dsCactus* hemocytes (Tables S1  
83 and S2). Most differentially expressed oenocytoid markers 22/23 (95%) were down-regulated,  
84 while one of the prohemocyte markers was up-regulated and the other one was down-regulated

85 (Fig. 1B). The number of down-regulated granulocyte markers 28/57 (49%) was very similar to  
86 that of up-regulated ones 29/57 (51%). However, detailed analysis of granulocyte  
87 subpopulations revealed that most up-regulated markers 18/29 (62%) correspond to megacytes,  
88 while most down-regulated markers correspond to regular granulocytes 21/28 (75%). This  
89 suggests that *dsCactus* silencing increases the proportion of circulating megacytes, at the  
90 expense of a reduction in regular granulocytes. **As expected, expression of several genes**  
91 **involved in *Toll* signaling or final effector this pathway, such as Toll-like receptors, CLIP**  
92 **proteases, Serpins, C-type Lectins and Defensin are upregulated in *dsCactus* hemocytes (Table**  
93 **S3).**  
94

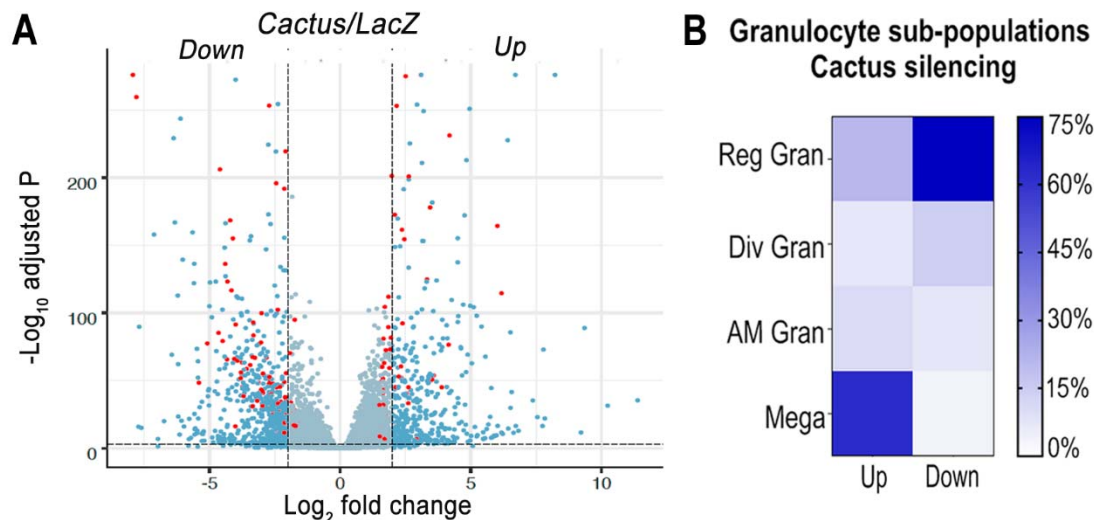

95

96 **Fig.1: Effect of *Toll* pathway activation on mRNA markers of granulocyte populations.** (A)  
97 Differential expression of Cactus dsRNA knockdown. From a total of 9421 filtered genes.  
98 Volcano plot of DE genes in Cactus silenced hemocytes compared to LacZ control filtered for  
99  $\log_2$  fold change  $> 2$  and Q-value  $< 0.001$ . Dark blue dots on the right represent upregulated DE  
100 genes and on the left the downregulated ones. Red dots show genes that are hemocytes specific  
101 markers. Complete list of up and down regulated genes is listed in Tables S1 and S2. (B)  
102 Percentage of granulocyte sub-population markers up and downregulated in Cactus silenced  
103 hemocytes. Complete list of up and down regulated genes for each hemocyte subpopulation is in  
104 Tables S1 and S2.

105

106

107

108

### 109 **Cactus silencing promotes granulocyte differentiation into megacytes**

110 Cactus silencing did not significantly increase the proportion of total circulating  
111 granulocytes, based on hemocyte counts by light microscopy (Fig. S2), suggesting that the  
112 observed enhanced immune response could be due to functional changes in hemocytes. The  
113 morphology of hemocytes perfused from *Cactus*-silenced females was analyzed using  
114 fluorescent probes to stain the actin cytoskeleton and the nucleus. *Cactus* silencing dramatically  
115 increased the proportion of large granulocytes (diameter > 40  $\mu\text{m}$ ), presumably megacytes, from  
116 5.3% to 79.2% ( $p < 0.0001$ ,  $X^2$  test) (Fig. 2A and B), in agreement with the observed increase in  
117 up-regulated megacyte-specific markers in the transcriptomic analysis of *Cactus*-silenced  
118 hemocytes (Fig. 1B). Interestingly, megacytes from *Cactus*-silenced mosquitoes (Fig. 2A) are  
119 even larger (average diameter of 47  $\mu\text{m}$  after spreading in a glass surface) than megacytes from  
120 dsLacZ controls (average diameter of 30  $\mu\text{m}$ ) (Figure 2C and D). *In situ* RNA hybridization of  
121 dsCactus granulocytes with a fluorescent probe for the megacyte-specific marker TM7318,  
122 confirmed that the proportion of TM7318-positive granulocytes was much higher (80%) in  
123 *Cactus*-silenced females than in dsLacZ controls (4%) ( $p < 0.0001$ ,  $X^2$  test) (Fig. 2E and F),  
124 providing direct evidence that overactivation of *Toll* signaling triggers a dramatic increase in the  
125 proportion of circulating megacytes. Expression analysis of the TM7318 marker in perfused  
126 hemocyte samples confirmed that mRNA levels were 42-fold higher in dsCactus hemocytes than  
127 the dsLacZ control group ( $p < 0.001$ , T-test) (Fig. 2G), while a modest increase (2.8-fold) in

128 FBN50 mRNA, a marker of antimicrobial (AM) effector granulocytes, was observed ( $p < 0.0001$ ,  
129 T-test). Conversely, expression of FBN11228, a marker of regular granulocytes, decreased by  
130 30-fold in circulating hemocytes of Cactus-silenced mosquitoes (Fig. 2G). The changes in the  
131 relative abundance of mRNAs from cell-specific markers in *dsCactus*-hemocytes agrees with the  
132 observed changes in hemocyte morphology and the *in situ* hybridization and transcriptomic data  
133 (Fig. 2G).

134 The relative increase in megacytes in *Cactus*-silenced *An. gambiae* females could be due  
135 to enhanced megacyte proliferation or to increased differentiation of regular granulocytes into  
136 megacytes. A total hemocyte count revealed that the number of circulating hemocytes was not  
137 significantly different between *dsLacZ* (mean 17,151/mosquito,  $n=14$ ) and *dsCactus* mosquitoes  
138 (mean 23,477/mosquito,  $n=14$ , Mann Whitney T-test) (Fig.S2A) 2 days post-injection. The  
139 mean number of total hemocytes was lower 4 days post-silencing, but there was also no  
140 significant difference between *dsLacZ* (mean 8,725/mosquito,  $n=14$ ) and *dsCactus* mosquitoes  
141 (mean 10,836 /mosquito,  $n=14$ , Mann Whitney T-test) (Fig.S2A). Furthermore, there was no  
142 difference in the proportion granulocytes at 2 days, *dsLacZ* (3.62%) and *dsCactus* females  
143 (3.48%, Mann Whitney T-test), and 4 days, *dsLacZ* (3.91%) and *dsCactus* females (5.47%,  
144 Mann Whitney T-test), post-injection. In contrast, a significant increase in the proportion of  
145 megacyte was already apparent 2 days post-injection in *Cactus*-silenced mosquitoes (2.08% of  
146 all hemocytes,  $p < 0.0001$ , Mann Whitney T-test), relative to *dsLacZ* controls (0.07%) (Fig.S2B);  
147 with a corresponding decrease in the proportion of other granulocytes from 3.5% in *dsLacZ*  
148 controls to 1.4% in *dsCactus* (Fig.S2B). At four days post injection, the differences were more  
149 pronounced, with the proportion of megacytes reaching 3.7% in *Cactus*-silenced mosquitoes  
150 ( $p < 0.0001$ , Mann Whitney T-test) relative to *dsLacZ* controls (0.07%) (Fig.S2C), with a

151 corresponding decrease in other granulocytes from 3.8% in *dsLacZ* to 1.8% in *dsCactus*  
152 mosquitoes (Fig.S2C). Taken together, these data indicate that, although the total number of  
153 hemocytes and the percentage of total granulocytes remained unchanged in response to *dsCactus*  
154 silencing, the proportion of megacytes increased at the expense of other granulocytes.

155         The effect of Cactus silencing on granulocyte proliferation was evaluated by quantitating  
156 the proportion of hemocytes that incorporated Bromodeoxyuridine /5-bromo-2'-deoxyuridine  
157 (BrdU), a thymidine analog. The proportion of BrdU+ hemocytes that adhered to glass (mostly  
158 granulocytes) in *dsCactus* mosquitoes (51%, n=694 cells) is not significantly different from  
159 *dsLacZ* controls (52%, n=410 cells) (Fig. S3A and B). BrdU fluorescence intensity (RFU) is  
160 also not significantly different between *dsLacZ* and *dsCactus* hemocytes (Fig. S3C). However,  
161 the ratio of BrdU fluorescence intensity to nuclear volume is significantly lower in *dsCactus*  
162 hemocytes (Fig. S3D). This indicates that the increase in nuclear volume in megacytes does not  
163 involve DNA replication. However, BrdU labeling can be lost over time, making it hard to  
164 establish when DNA replication occurred. The proportion of hemocytes undergoing mitosis after  
165 Cactus silencing was directly evaluated using phospho-Histone H3 (PHH3) staining, which only  
166 labels mitotically active cells. Two days post-injection, the proportion of PHH3+ hemocytes that  
167 adhered to glass (mostly granulocytes) in *dsCactus* mosquitoes (0.7%, n=896) was small, and not  
168 significantly different from *dsLacZ* controls (0.6%, n=718 cells) (Fig. S2D). At four days the  
169 proportions were also similar, with very few hemocytes positive for PHH3 staining both in  
170 *dsLacZ* (0.5%, n=799 cells) and *dsCactus* (0.3%, n=1039) (Fig. S2D). Moreover, the few  
171 hemocytes that were positive for PHH3 in *dsCactus* mosquitoes did not have the characteristic  
172 size or morphology of megacytes (Fig.S2D). These observations, together with the increase in  
173 the proportion of megacytes in *dsCactus* females, at the expense of other regular granulocytes



174 (Fig. 1B and 2G), indicate that *Cactus* silencing promotes differentiation of granulocytes to the  
 175 megacyte lineage.

176

177

178

179

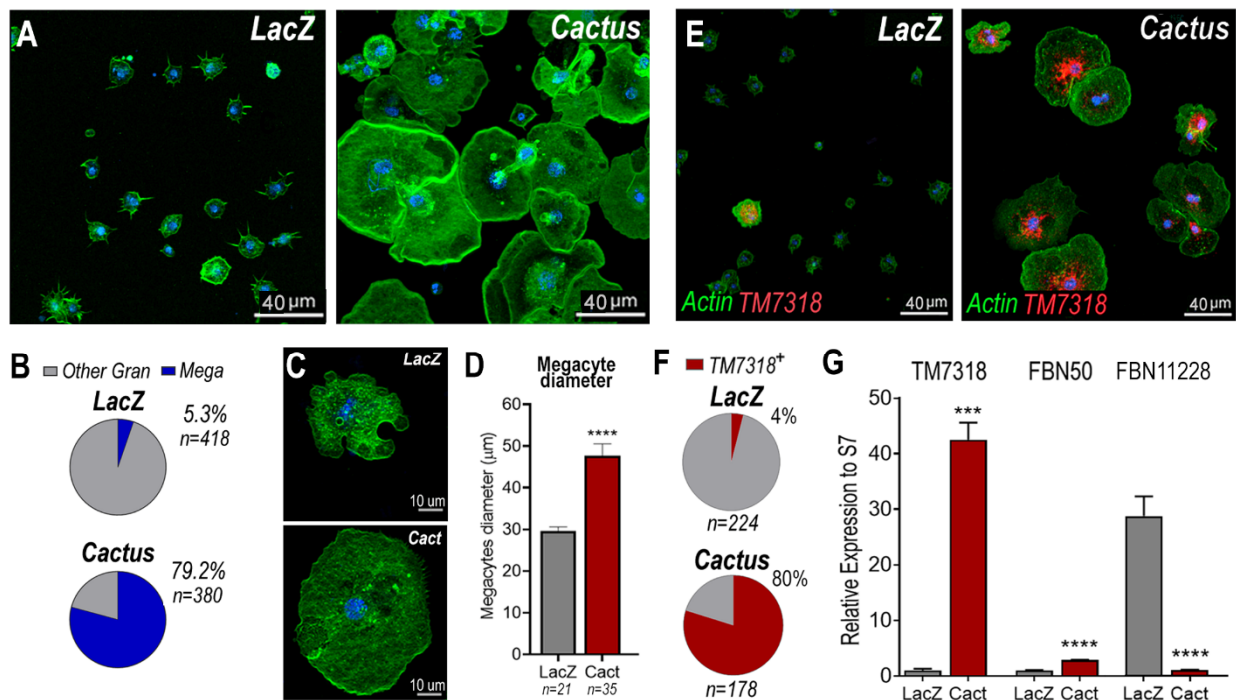

180

181 **Fig.2: Cactus silencing promotes granulocyte differentiation into megacytes.** (A) *An.*  
 182 *gambiae* hemocytes in LacZ control and Cactus attached to a glass surface. Actin is shown in  
 183 green and nuclei in blue. Scale Bar: 40μm. (B) Percentage of megacytes among all granulocytes  
 184 in dsLacZ and dsCactus mosquitoes. Percentages were compared using X<sup>2</sup> test. \*\*\*\*P≤0.0001.  
 185 (C) Megacyte in control LacZ mosquitoes (upper) and in Cactus-silenced mosquitoes (lower).  
 186 Actin is showing in green, and nuclei is in blue. Scale Bar: 10um. (D) Diameter of megacytes  
 187 from LacZ control and Cactus-silenced mosquitoes. Error bars represent mean± SEM. Unpaired  
 188 t-test. \*\*\*\*P≤0.0001. (E) RNA *in situ* hybridization for megacyte specific marker TM7318.  
 189 Actin is shown in green (phalloidin), TM7318 mRNA in red and the nuclei in blue (Hoechst).  
 190 Scale bar: 40μm. (F) Percentage of TM7318 positive cells in LacZ and Cactus silenced  
 191 granulocytes. Percentages were compared using X<sup>2</sup> test. \*\*\*\*P≤0.0001. (G) Relative mRNA  
 192 expression of hemocyte specific markers in LacZ control and Cactus hemocytes for  
 193 transcriptome validation. Megacyte marker (TM7318), antimicrobial granulocytes (FBN50) and

194 regular granulocytes (FBN11228). Gene expression was normalized using RpS7 expression.  
195 Error bars represent mean  $\pm$  SEM. Unpaired t-test, \*\*\*\*P $\leq$ 0.0001.  
196

### 197 **Cell dynamics of mosquito granulocytes**

198 Megacytes are about twice as large as regular granulocytes. Regular granulocytes (Fig.  
199 3A) reach an average diameter of 14.2  $\mu$ m (Fig. 3B) when they spread over a glass surface, while  
200 the average diameter of megacytes is 28.6  $\mu$ m (p<0.0001, Unpaired T-test) (Fig. 3A and 3B).  
201 Granulocyte cellular dynamics was evaluated by live imaging of perfused hemocytes *in vitro* as  
202 they adhered and spread on a glass surface. Hemocytes were labeled *in vivo*, through systemic  
203 injection of adult females with a red lipophilic dye (Vybrant CM-DiI) that accumulates on  
204 intracellular vesicles. After perfusion, a green, fluorescent probe (Cell Mask) was added to label  
205 the plasma membrane. Both regular granulocytes and megacytes attached to the glass surface and  
206 spread fully within one hour (Videos S1-S4). Megacytes already have a larger cell diameter  
207 when they first attach to glass (Fig. 3C, upper panel and Video S3), and exhibit a peripheral  
208 “halo”, corresponding to an area of extended thin cytoplasm, almost devoid of vesicles (Fig. 3C,  
209 upper panel and Video S3). Lateral views revealed that, initially, megacytes have a large nucleus  
210 and a voluminous cytoplasm in the central region of the cell that flattens dramatically as the cell  
211 “spreads” over the glass surface (Fig. 3C, lower panel and Video S4). In contrast, the central  
212 region of regular granulocytes remains mostly unchanged (Fig. 3D, lower panel and Video S2)  
213 and the periphery of the cell exhibits a modest increase in diameter as the cell spreads along the  
214 surface (Fig. 3D, upper panel and Video S1).

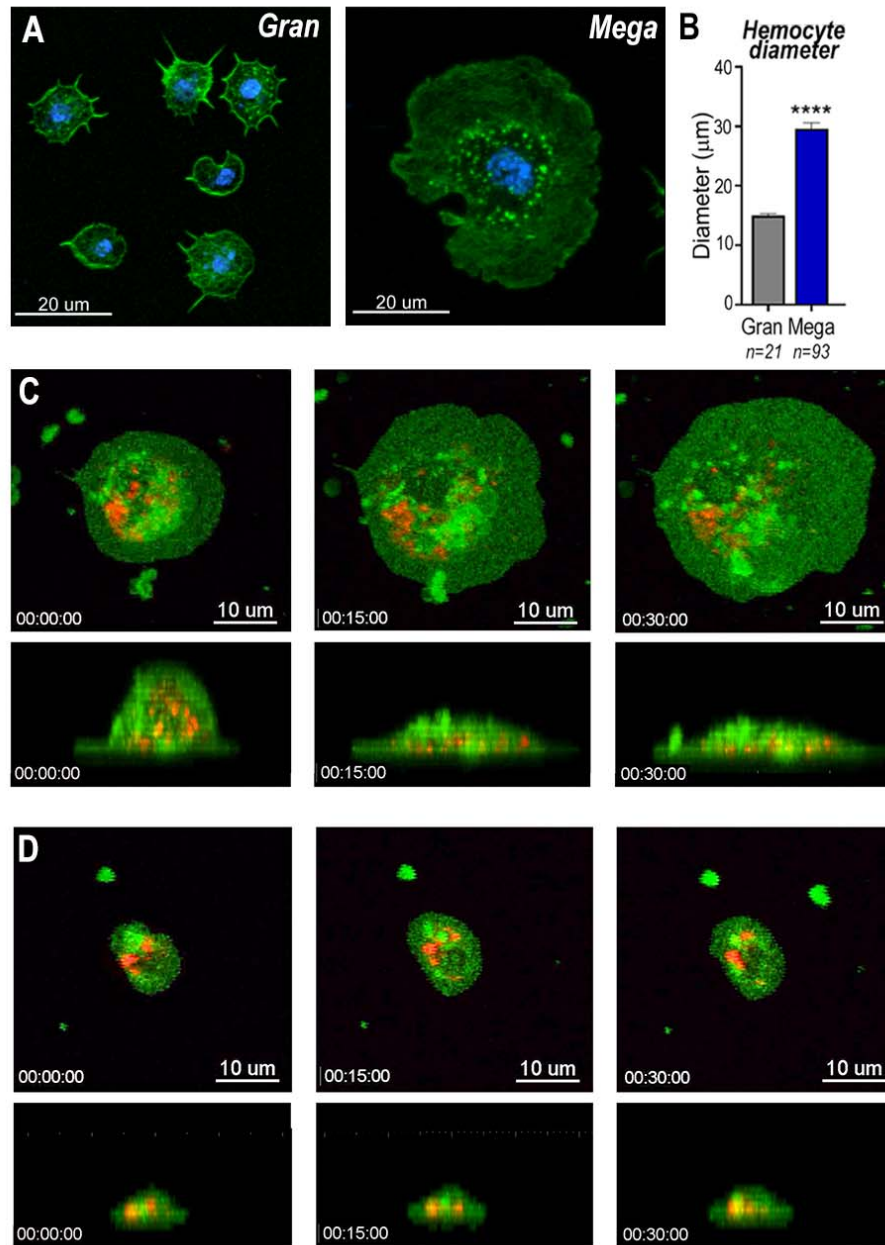

215

216 **Fig. 3: Snapshots of megacyte and granulocyte cell dynamics.** (A) Regular granulocytes and  
217 megacytes from *An. gambiae* females spread on a glass surface. Actin, green (phalloidin) and  
218 nuclei, blue (Hoechst). Scale bar: 20 $\mu\text{m}$ . (B) Granulocyte diameter of sugar-fed mosquitoes after  
219 spreading on a glass surface. Error bars represent mean $\pm$  SEM. Unpaired t-test. \*\*\*\* $P \leq 0.0001$ .  
220 (C) Live imaging time-lapse of a megacyte spreading in a glass surface for 30 minutes. Plasma  
221 membrane stained in green and microvesicles in red. Top (XY) and lateral view (XZ) of a  
222 megacyte. Scale Bars: 10 $\mu\text{m}$  and 5 $\mu\text{m}$ , respectively. (D) Live imaging time-lapse of a  
223 granulocyte spreading on a glass surface for 30 minutes. Top (XY) and lateral view (XZ) of a  
224 regular granulocyte. Scale Bars: 10 $\mu\text{m}$  and 5 $\mu\text{m}$ , respectively. (See Videos S1-S4).

## 225 **Characterization of megacyte *in vivo* dynamics and ultrastructure**

226 The effect of *Cactus* silencing on granulocyte dynamics was evaluated *in vivo*, through live  
227 imaging of hemocytes circulating in adult female mosquitoes. Female mosquitoes were imaged  
228 for 2h, one day after blood feeding on a healthy mouse. Hemocytes were visualized by systemic  
229 injection of Vybrant CM-DiI, a fluorescent lipophilic dye that is preferentially taken up by  
230 granulocytes. Circulating hemocytes in *dsLacZ* females (presumably normal granulocytes) have  
231 a smaller diameter than those of *dsCactus* females (Videos S5 and S6) (Fig. 3A and B), and they  
232 seldom come in contact with each other as they patrol the basal surface of the midgut (Video S5).  
233 Hemocytes from *dsCactus* females (presumably megacytes) are larger and have a spindle shape  
234 (Fig. A and B, Videos S3 and S4). They appear to have higher plasticity, as they can readily  
235 stretch their cytoplasm and often come into contact with each other (Videos S6). The plasticity  
236 of *dsCactus* megacytes was confirmed by *in vitro* live imaging of perfused hemocytes labeled by  
237 systemic injection of Vybrant CM-DiI and green Cell Mask. Some megacytes from *dsCactus*  
238 mosquitoes projected long thin filopodia towards other megacytes (Video S7). This process was  
239 not observed in regular granulocytes or in megacytes from the *dsLacZ* controls. Taken together,  
240 our live imaging data indicates that, in addition to their larger diameter (Fig. 2C and D),  
241 *dsCactus* megacytes are also more active, have increased plasticity as they patrol the midgut  
242 (Video S6), and greater tendency to interact with each other and form clusters (Videos S6 and  
243 S7).

244 The detailed ultrastructure of megacytes was explored using Transmission Electron Microscopy  
245 (TEM). Hemocytes from *Cactus*-silenced females were collected by perfusion, fixed in  
246 suspension, and allowed to settle. As expected, the maximum diameter of hemocytes fixed while  
247 in suspension was smaller than when they were allowed to spread on a glass surface. However,

248 regular granulocytes were still significantly smaller (6-10  $\mu\text{m}$ ) than megacytes (15-20  $\mu\text{m}$ ), with  
249 nuclei that are also proportionally smaller (Fig. 4A and B). Extensive electron-dense areas are  
250 observed in the nuclei of megacytes, probably corresponding to the nucleolus. Large numbers of  
251 cytoplasmic vacuoles that contain abundant amorphous material are observed, as well as an  
252 extensive mitochondrial network (Fig. 4A and B). Mitochondrial organization of perfused  
253 hemocytes was further investigated using Mitotracker staining. Mitochondria of regular  
254 granulocytes have a punctate pattern with strong staining on individual organelles (Fig. 4D). In  
255 contrast, megacytes exhibit a more diffuse and extensive mitochondrial network (Fig. 4E). It is  
256 noteworthy that large membrane-bound mitochondria-like extracellular structures and small  
257 vesicles are often observed “budding off” from the surface of *dsCactus* megacytes (Fig. 4B-C),  
258 but not from regular granulocytes (Fig. 4A).

259

260

261

262

263

264

265

266

267

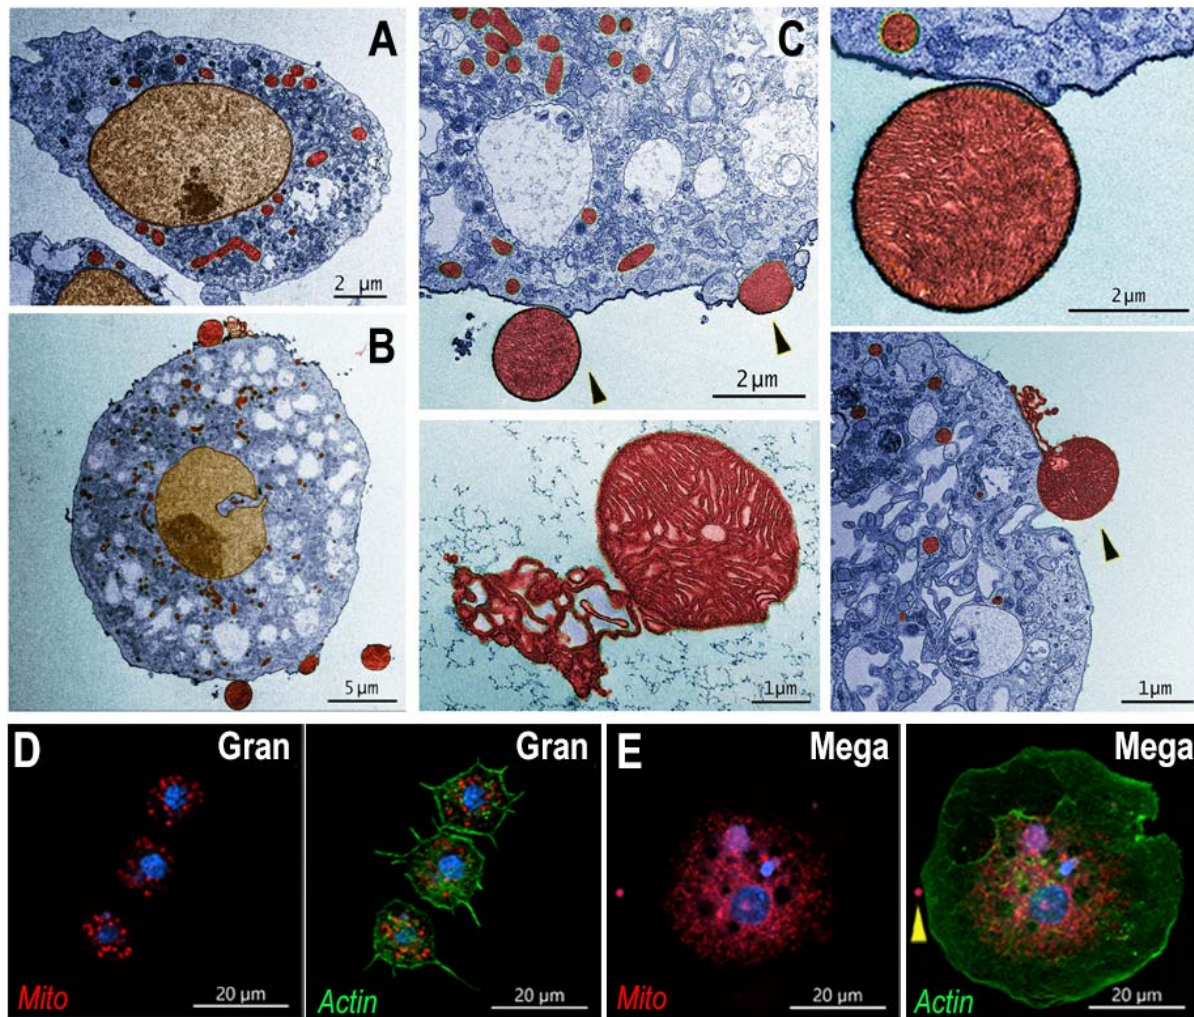

268

269 **Fig.4: Ultrastructure of megacytes in Cactus-silenced mosquitoes.** (A) Transmission Electron  
270 Microscopy (TEM) of regular granulocytes from Cactus-silenced mosquitoes. Scale Bar: 2μm.  
271 (B) TEM of megacytes from Cactus-silenced mosquitoes. Scale Bar: 5um. (C) Extracellular giant  
272 mitochondria-like structures (black arrows). Close-up of a mitochondria-like structure (lower  
273 center). Scale Bars: 2μm and 1μm. TEM images were digitally colorized, cytoplasm is shown in  
274 blue, mitochondria in red and nuclei in golden yellow. (D) Mitotracker staining in regular  
275 granulocytes. Scale Bar: 20um. (E) Mitochondrial staining of Cactus-silenced megacytes. Actin  
276 is stained in green (phalloidin), mitochondria in red (mitotracker) and nuclei in blue (Hoechst).  
277 Yellow arrow indicates an extracellular mitochondrion like structure outside of a megacyte.  
278 Scale bar: 20μm.

279

280

281 **Megacytes associate with the basal surface of the midgut in response to bacterial feeding**

282 We have shown that direct contact of bacteria with epithelial cells, before the peritrophic matrix  
283 is formed, triggers PGE2 release and attracts hemocytes to the basal surface of the midgut  
284 (Barletta et al., 2019). Hemocyte recruitment to the midgut in *dsCactus* females was explored by  
285 providing a BSA protein meal containing bacteria. As expected, bacterial feeding attracted  
286 hemocytes to the **midgut surface** in both *dsCactus* and *dsLacZ* control females (Fig. 5A and B).  
287 However, there are important differences in hemocyte recruitment between them. In *dsLacZ*  
288 females, hemocytes attach to the midgut basal lamina individually or in doublets (Fig.5A), while  
289 hemocytes from *dsCactus* females form large clusters on the basal midgut surface, with multiple  
290 hemocytes in very close association (Fig.5B and C). *dsCactus* hemocytes on the midgut surface  
291 have the characteristic morphology of megacytes, with a larger cytoplasm and nuclei than those  
292 from *dsLacZ* hemocytes (Fig. 5B and C). Accumulation of actin was often observed in the  
293 boundaries where hemocytes from *dsCactus* females come in direct contact **with each other** as  
294 they form **extensive** clusters (Fig. 5D).

295 The recruitment of granulocyte subpopulations to the midgut of *dsCactus* females in  
296 response bacterial feeding was confirmed by quantitation of midgut-associated mRNAs  
297 transcripts of markers expressed in specific hemocyte subpopulations. TM7318 mRNA levels  
298 increased dramatically in *dsCactus* midguts after bacterial feeding (250-fold increase) relative to  
299 *dsLacZ* control ( $p=0.0022$ , Mann-Whitney test) (Fig. 5E), indicative of extensive megacyte  
300 recruitment. A significant, but more modest increase in FBN50 (5-fold) ( $p=0.0152$ , Mann-  
301 Whitney test) a marker of antimicrobial granulocytes, was also observed (Fig. 5E).

302

303 ***Toll* signaling is required for megacyte differentiation and *Plasmodium* ookinete**  
304 **elimination in *Cactus*-silenced females.**

305 To establish whether differentiation of granulocytes to the megacyte lineage in *dsCactus*  
306 females was mediated by the *Toll* pathway, the effect of co-silencing the *Rel1* transcription factor  
307 was evaluated. As expected, *Cactus* silencing dramatically increased the proportion of  
308 megacytes, from 3.5% to 76% ( $p < 0.0001$ ,  $X^2$  test) (Fig. 6A and B). Co-silencing *Cactus* and *Rel1*  
309 reverted this effect, resulting in a proportion of megacytes (6.6%) not significantly different from  
310 *LacZ* controls (Fig. 6B). This indicates that *Toll* signaling, through *Rel1*, mediates megacyte  
311 differentiation in *dsCactus* females.

312 We next investigated the effect of *Toll* signaling on the immune response to *Plasmodium*  
313 of *dsCactus*-silenced females and megacyte HdMv release. *Cactus* silencing drastically reduced  
314 oocyst numbers (median= 0,  $p < 0.0001$ , ANOVA, Dunn's multiple comparison test) relative to  
315 *LacZ* controls (median= 127) (Fig. 6C), and co-silencing *Cactus* and *Rel1* significantly increase  
316 oocyst numbers (median= 24,  $p = 0.0002$ , ANOVA, Dunn's multiple comparison test) (Fig. 6C),  
317 in agreement with previous reports (Frolet *et al.*, 2006). A strong increase in TM7318 mRNA  
318 associated with the midgut 24 h post-infection was detected in *dsCactus* infected females (13-  
319 fold increase), relative to *dsLacZ* ( $p < 0.0001$ , Mann-Whitney test) (Fig. 6D and S4), indicative of  
320 midgut recruitment of megacytes. Furthermore, when *Rel1* was co-silenced with *Cactus*, the  
321 levels of midgut-associated TM7318 mRNA decreased and were not significantly different from  
322 those of *dsLacZ* controls. In contrast, mRNA levels of FBN11228, a marker of regular  
323 granulocytes, did not change significantly in *dsCactus* females or after co-silencing *Rel1* and  
324 *Cactus*, relative to *dsLacZ* (Fig. S5).



325

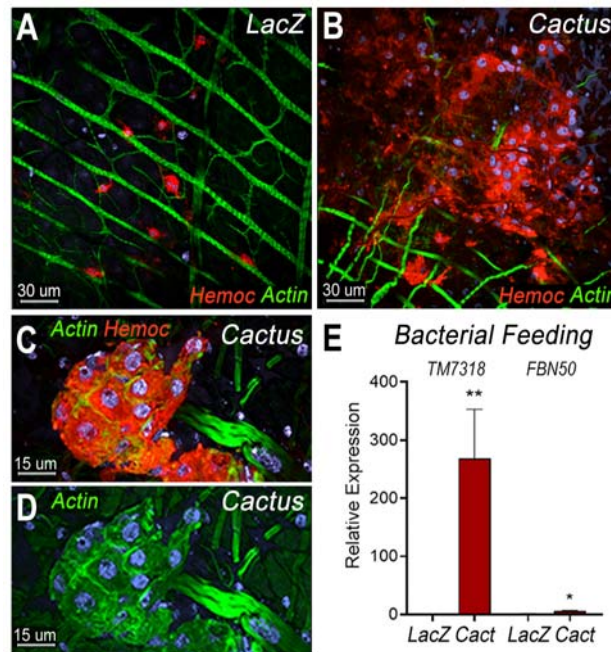

326

327 **Fig. 5: Bacterial feeding increases megacyte association to the midgut basal surface.** (A)  
328 Effect of bacterial feeding in LacZ-injected controls on hemocytes associated to the midgut basal  
329 surface. (B) Effect of Cactus silencing on the hemocytes associated to the basal surface of the  
330 midgut 4 hours post bacterial feeding. (A) and (B) Scale Bar: 30um. (C) and (D) Hemocyte  
331 cluster attached to the midgut surface in Cactus-silenced mosquitoes 4 hours post bacterial  
332 feeding. Scale bar: 15  $\mu$ m. (A-D) Midgut actin is shown in green (phalloidin), hemocytes  
333 (stained with Vybrant CM-DiI) in red and nuclei in blue (Hoechst). (E) Relative mRNA levels of  
334 effector hemocyte markers in the midgut 4 hours after bacterial feeding in LacZ and Cactus-  
335 silenced mosquitoes. Scale bar: 15 $\mu$ m. Error bars in (E) represent mean  $\pm$  SEM. Unpaired t-test,  
336 \* $P \leq 0.05$ , \*\* $P \leq 0.01$ .

337

338

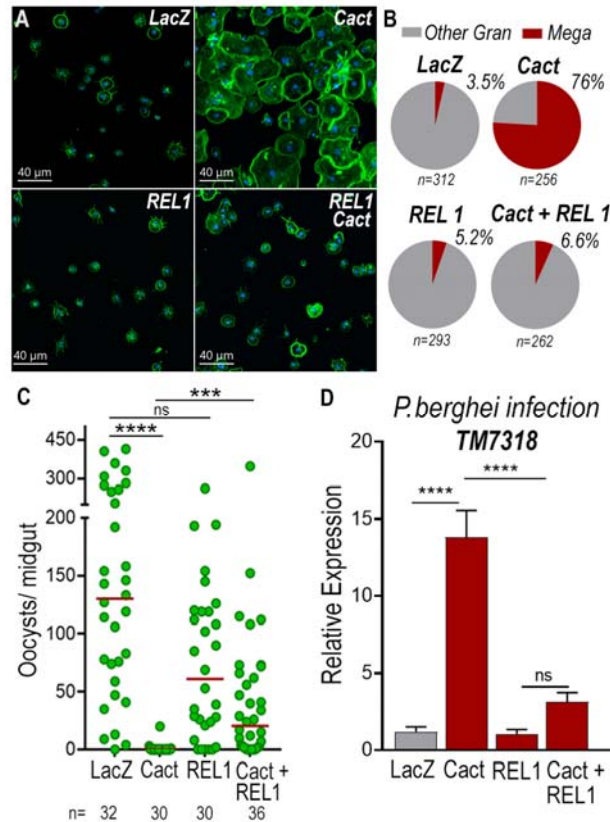

339

340

341 **Fig. 6: Toll signaling is required for megacyte differentiation and *Plasmodium* ookinete**  
 342 **elimination in *dsCactus* females.**

343 (A) *An.gambiae* hemocytes in LacZ control, Cactus, *Rel1* and Cactus + *Rel1* attached to a glass  
 344 surface. Actin is shown in green and nuclei in blue. Scale Bar: 40µm. (B) Percentage of  
 345 megacytes among all granulocytes in dsLacZ, dsCactus, ds *Rel1* and dsCactus + *Rel1*  
 346 mosquitoes. Percentages were compared using  $X^2$  test. \*\*\*\* $P \leq 0.0001$ . (C) Mosquito  
 347 susceptibility to *P. berghei* infection after dsRNA injection for LacZ, Cactus, *Rel1* and Cactus +  
 348 *Rel1*. Each dot in C represent the number of oocysts or hemocytes, respectively, for individual  
 349 midguts. The median is indicated by the red line. Mann-Whitney U test, \*\*\*\* $p \leq 0.0001$ ; \*\*\* $p \leq$   
 350  $0.001$ , NS,  $p > 0.05$ . (D) Relative mRNA levels of TM7318, megacyte marker, in the midgut 26  
 351 h post *P. berghei* infection (post-invasion) in LacZ, Cactus, *Rel1* and Cactus + *Rel1* silenced  
 352 mosquitoes. Error bars in (D) represent mean  $\pm$  SEM. Unpaired t-test, \*\*\*\* $P \leq 0.0001$ , NS,  $p >$   
 353  $0.05$ .

354

355

## 356 Discussion

357 We recently described specific subsets of mosquito granulocytes based on single-cell

358 transcriptomic analysis (Raddi et al., 2020). Here we present a functional characterization of

359 megacytes, a newly described subpopulation of final effector granulocytes and provide direct  
360 evidence of their recruitment to the basal surface of the mosquito midgut and their participating  
361 in the mosquito immune response to ookinete midgut invasion. The almost complete elimination  
362 of *P. berghei* parasites by the mosquito complement system when Cactus is silenced was  
363 documented more than fifteen years ago (Frolet et al., 2006). However, the mechanism by which  
364 Cactus silencing enhanced hemocyte responses to *Plasmodium* infection remained a mystery.

365 Our transcriptomic analysis indicated that Cactus silencing increased the proportion of  
366 circulating megacytes, at the expense of regular granulocytes (Fig. 2). This was confirmed by  
367 morphological analysis, *in situ* hybridization, cell counts and mRNA quantitation of hemocyte-  
368 specific markers, TM7318 (megacytes) and FBN11228 (regular granulocytes). We also provide  
369 direct evidence that, besides being larger, megacytes also have higher plasticity, as they can  
370 greatly extend their cytoplasm and flatten their nucleus as they spread on a glass surface (Fig.  
371 1C).

372 The lack of DNA replication and the concomitant reduction in the proportion of regular  
373 granulocytes, indicates that circulating megacytes increase in response to Cactus silencing by  
374 promoting final differentiation of granulocytes to the megacyte lineage. Besides the dramatic  
375 increase in circulating megacytes, Cactus silencing also results in megacytes that are even larger  
376 and more plastic than megacytes from dsLacZ controls. Fine ultrastructural analysis revealed  
377 that the cytoplasm of megacytes exhibits extensive large vacuolar structures filled with  
378 amorphous material, as well as small vesicles and mitochondria-like structures that are secreted  
379 from the cell membrane. In vertebrates, mitochondrial extrusion has been recently documented  
380 as a trigger of inflammation. Activated platelets release their mitochondria, both within  
381 microparticles or as free organelles; and secreted phospholipase A2 IIA can hydrolyze the

382 membrane, releasing inflammatory mediators, such as lysophospholipids, fatty acids, and  
383 mitochondrial DNA, that promote leukocyte activation. Furthermore, extracellular mitochondria  
384 also interact directly with neutrophils *in vivo*, and trigger their adhesion to the endothelial wall  
385 (Boudreau et al., 2014). Activated monocytes release mitochondria, and their proinflammatory  
386 effect on endothelial cells is determined by the activation status of the monocytes that released  
387 them. It has been proposed that free mitochondria could be important mediators of  
388 cardiovascular disease by inducing activation of type I IFN and TNF signaling (Puhm et al.,  
389 2019).

390 Large numbers of megacytes were recruited to the midgut of Cactus-silenced females in  
391 response to bacterial feeding, forming extensive clusters of cells in close contact with each other,  
392 indicating that Cactus silencing also results in functional differences in megacytes. Expression  
393 of midgut associated markers of specific hemocyte subpopulations indicates that *Plasmodium*  
394 midgut invasion triggers strong recruitment of megacytes to the basal surface of the midgut in  
395 *dsCactus* females, in agreement with the documented increase in HdMv associated with  
396 epithelial cells invaded by ookinetes (Castillo et al., 2017). We also show that co-silencing the  
397 transcription factor *Rel1* and *Cactus* disrupts the differentiation of granulocyte to the megacyte  
398 lineage observed when only *Cactus* is silenced, indicating that megacyte differentiation requires  
399 a functional *Toll* pathway. Co-silencing *Rel1* and *Cactus* also reduced midgut recruitment of  
400 megacytes 24 h post-infection, a critical time when ookinetes are invading the mosquito midgut,  
401 and significantly increases *Plasmodium* survival, relative to *dsCactus* females. We propose that  
402 Toll signaling promotes hemocyte differentiation into the megacyte lineage, and that the  
403 dramatic increase in the proportion of circulating megacytes and their midgut recruitment  
404 mediates the documented increase in HdMv (Castillo et al., 2017) that promotes activation of the

405 mosquito complement system that ultimately eliminates *P. berghei* ookinetes. The release of free  
406 mitochondria-like structures by megacytes from Cactus-silenced females raises the question of  
407 whether this is an ancient systemic danger signal that promotes immune activation.

408

#### 409 **Data Availability**

410 The raw data and detailed information on individual experiments and number of replicates are  
411 available at Supplementary tables file.

412

#### 413 **Acknowledgments**

414 This work was supported by the Intramural Research Program of the Division of Intramural  
415 Research Z01AI000947, NIAID, National Institutes of Health. We thank Kevin Lee, Yonas  
416 Gebremicale and André Laughinghouse for insectary support, and Asher Kantor for editorial  
417 assistance.

418

#### 419 **Author Contributions**

420 Experiments were designed by A.B.F.B., N.T., B.S., G.R. and C.B.M., carried out by A.B.F.B.  
421 B.S., N.T., and analyzed by A.B.F.B., N.T., B.S., G.R. and C.B.M. A.B.F.B. and C.B.M. wrote  
422 the paper.

423

424

#### 425 **Declaration of Interests**

426 The authors declare no competing financial interests.

427

428 **References**

- 429 BARLETTA, A. B. F., TRISNADI, N., RAMIREZ, J. L. & BARILLAS-MURY, C. 2019.  
430 Mosquito Midgut Prostaglandin Release Establishes Systemic Immune Priming. *iScience*, 19,  
431 54-62.
- 432 BLANDIN, S., SHIAO, S. H., MOITA, L. F., JANSE, C. J., WATERS, A. P., KAFATOS, F. C.  
433 & LEVASHINA, E. A. 2004. Complement-like protein TEP1 is a determinant of vectorial  
434 capacity in the malaria vector *Anopheles gambiae*. *Cell*, 116, 661-70.
- 435 BOUDREAU, L. H., DUCHEZ, A. C., CLOUTIER, N., SOULET, D., MARTIN, N.,  
436 BOLLINGER, J., PARE, A., ROUSSEAU, M., NAIKA, G. S., LEVESQUE, T., LAFLAMME,  
437 C., MARCOUX, G., LAMBEAU, G., FARNDAL, R. W., POULIOT, M., HAMZEH-  
438 COGNASSE, H., COGNASSE, F., GARRAUD, O., NIGROVIC, P. A., GUDERLEY, H.,  
439 LACROIX, S., THIBAUT, L., SEMPLE, J. W., GELB, M. H. & BOILARD, E. 2014. Platelets  
440 release mitochondria serving as substrate for bactericidal group IIA-secreted phospholipase A2  
441 to promote inflammation. *Blood*, 124, 2173-83.
- 442 CASTILLO, J. C., FERREIRA, A. B. B., TRISNADI, N. & BARILLAS-MURY, C. 2017.  
443 Activation of mosquito complement antiplasmodial response requires cellular immunity. *Sci*  
444 *Immunol*, 2.
- 445 FROLET, C., THOMA, M., BLANDIN, S., HOFFMANN, J. A. & LEVASHINA, E. A. 2006.  
446 Boosting NF-kappaB-dependent basal immunity of *Anopheles gambiae* aborts development of  
447 *Plasmodium berghei*. *Immunity*, 25, 677-85.
- 448 HAN, Y. S., THOMPSON, J., KAFATOS, F. C. & BARILLAS-MURY, C. 2000. Molecular  
449 interactions between *Anopheles stephensi* midgut cells and *Plasmodium berghei*: the time bomb  
450 theory of ookinete invasion of mosquitoes. *EMBO J*, 19, 6030-40.

451 KUMAR, S., MOLINA-CRUZ, A., GUPTA, L., RODRIGUES, J. & BARILLAS-MURY, C.  
452 2010. A peroxidase/dual oxidase system modulates midgut epithelial immunity in *Anopheles*  
453 *gambiae*. *Science*, 327, 1644-8.

454 LOVE, M. I., HUBER, W. & ANDERS, S. 2014. Moderated estimation of fold change and  
455 dispersion for RNA-seq data with DESeq2. *Genome Biol*, 15, 550.

456 MOLINA-CRUZ, A., DEJONG, R. J., ORTEGA, C., HAILE, A., ABBAN, E., RODRIGUES,  
457 J., JARAMILLO-GUTIERREZ, G. & BARILLAS-MURY, C. 2012. Some strains of  
458 *Plasmodium falciparum*, a human malaria parasite, evade the complement-like system of  
459 *Anopheles gambiae* mosquitoes. *Proc Natl Acad Sci U S A*, 109, E1957-62.

460 OLIVEIRA GDE, A., LIEBERMAN, J. & BARILLAS-MURY, C. 2012. Epithelial nitration by  
461 a peroxidase/NOX5 system mediates mosquito antiplasmodial immunity. *Science*, 335, 856-9.

462 PUHM, F., AFONYUSHKIN, T., RESCH, U., OBERMAYER, G., ROHDE, M., PENZ, T.,  
463 SCHUSTER, M., WAGNER, G., RENDEIRO, A. F., MELKI, I., KAUN, C., WOJTA, J.,  
464 BOCK, C., JILMA, B., MACKMAN, N., BOILARD, E. & BINDER, C. J. 2019. Mitochondria  
465 Are a Subset of Extracellular Vesicles Released by Activated Monocytes and Induce Type I IFN  
466 and TNF Responses in Endothelial Cells. *Circ Res*, 125, 43-52.

467 RADDI, G., BARLETTA, A. B. F., EFREMOVA, M., RAMIREZ, J. L., CANTERA, R.,  
468 TEICHMANN, S. A., BARILLAS-MURY, C. & BILLKER, O. 2020. Mosquito cellular  
469 immunity at single-cell resolution. *Science*, 369, 1128-1132.

470 RAMIREZ, J. L., GARVER, L. S., BRAYNER, F. A., ALVES, L. C., RODRIGUES, J.,  
471 MOLINA-CRUZ, A. & BARILLAS-MURY, C. 2014. The role of hemocytes in *Anopheles*  
472 *gambiae* antiplasmodial immunity. *J Innate Immun*, 6, 119-28.

473 RAUDVERE, U., KOLBERG, L., KUZMIN, I., ARAK, T., ADLER, P., PETERSON, H. &  
474 VILO, J. 2019. g:Profiler: a web server for functional enrichment analysis and conversions of  
475 gene lists (2019 update). *Nucleic Acids Res*, 47, W191-W198.  
476 TRISNADI, N. & BARILLAS-MURY, C. 2020. Live In Vivo Imaging of Plasmodium Invasion  
477 of the Mosquito Midgut. *mSphere*, 5  
478  
479



480 **Material and Methods**

481 *Mosquitoes and mouse feeding*

482 *Anopheles gambiae* mosquitoes (G3 strain – CDC) were reared at 28°C, 80% humidity under a  
483 12h light/ dark cycle and kept with 10% Karo syrup solution during adult stages. For mosquito  
484 infections with *Plasmodium berghei*, we used the transgenic GFP *P.berghei* parasites (ANKA  
485 2.34 strain) kept by serial passages into 3-4 weeks old female BALB/c mice (Charles River,  
486 Wilmington, MA) starting from frozen stocks. Mouse infectivity was evaluated before feeding  
487 by parasitemia levels from Giemsa-stained thin blood films and *in vitro* microgamete  
488 exflagellation counting. Briefly, one microliter of tail blood was mixed with 9ul of gametocyte  
489 activating medium (RPMI 1640 with 25mM HEPES + 2mM glutamine, Sodium Bicarbonate  
490 2g/L, 100uM xanthurenic acid, 50ug/ml hypoxanthine). After 10 minutes of incubation  
491 exflagellations were quantified using a 40X objective by phase contrast. Four to five-day old  
492 mosquitoes were fed when mice reached 3-5% parasitemia and 2-3 exflagellation per field. To  
493 feed blood-fed control mosquitoes, three- to four-week-old uninfected mice were used.  
494 Following feeding, both control and infected mosquitoes were maintained at 19°C, 80% humidity  
495 and 12h light/dark cycle until the day of dissection.

496

497 *Ethics statement*

498 Public Health Service Animal Welfare Assurance #A4149-01 guidelines were followed  
499 according to the National Institutes of Health Animal (NIH) Office of Animal Care and Use  
500 (OACU). These studies were done according to the NIH animal study protocol (ASP) approved  
501 by the NIH Animal Care and User Committee (ACUC), with approval ID ASP-LMVR5.

502

503 *Perfused hemocytes live imaging*

504 Three-day-old adult females were injected with Vybrant DiI (1:10 water diluted, ThermoFisher  
505 Scientific, Waltham, MA, USA) on one side of the thorax. The next day, mosquitoes were  
506 injected with 69 nL of either dsCactus or dsLacZ at 3  $\mu\text{g}/\mu\text{L}$  on the other side of the thorax. After  
507 4 days, hemocytes were ready for perfusion or mosquitoes were used for in vivo live imaging as  
508 described below. Mosquitoes were cold-anesthetized and, using forceps, a small cut was made in  
509 the abdomen. Transfer buffer (95% Schneider media + 5% citrate buffer) was injected at the  
510 thorax and 10-15  $\mu\text{L}$  of hemolymph was harvested at the cut-site. This was repeated for 5-7  
511 mosquitoes and collected in a microcentrifuge tube stored on ice. To stain the plasma membrane  
512 of hemocytes we used CellMask green plasma membrane stain stock solution (C37608,  
513 Invitrogen, Waltham, MA, USA) and for the nuclei we used the Hoechst 33342 Solution  
514 (20mM) (ThermoFisher Scientific, Waltham, MA, USA). Two microliters of fluorescent label  
515 solution (58  $\mu\text{L}$  H<sub>2</sub>O + 1  $\mu\text{L}$  Cell Mask stock + 1 $\mu\text{L}$  Hoechst stock) was added for every 20  $\mu\text{L}$   
516 of perfusion and 100  $\mu\text{L}$  of this mixture was mounted on an ibidi  $\mu$ -Slide 18 Well Glass Bottom  
517 slide. Cells were allowed to settle for 30 minutes then imaged. Images were taken on a Leica SP5  
518 confocal microscope using a 63x 1.4 NA oil objective with 405 nm wavelength laser (at 3%  
519 transmission) for Hoechst, 488 nm (5%) for Cell Mask, and 561 nm (3%) for DiI. Pinhole was  
520 set to 1 AU and frame average was 12. Z-intervals of 1-2  $\mu\text{m}$  encompassing the full cell height  
521 was taken every 5 minutes for 2 hours.

522

523 *Bacterial artificial feeding*

524 We used a bacterial mixture obtained from the midguts of the *Anopheles gambiae* G3 from our  
525 colony (Barletta et al., 2019). A pre-inoculum was set up in LB media from the frozen stocks

526 containing the bacterial mixture and allow to grow overnight at 28°C, 250rpm in a shaker  
527 incubator. At the day of the experiment, the pre-inoculum was diluted in fresh LB media and  
528 allowed to grow for 2 hours in the same condition described above. Briefly, after 2 hours of  
529 growth, bacteria were washed with sterile PBS to remove toxins and the concentration of the  
530 culture was estimated based on the Optical Density (OD) of the culture. At 600nm, 1OD was  
531 considered the equivalent of 10<sup>9</sup> bacteria/mL. Three-to-four day mosquitos were fed a sterile  
532 10% sucrose solution containing antibiotics (Penicillin, 100U/mL and Streptomycin, 100ug/mL)  
533 for 2 days prior the bacterial feeding. Control group was fed with a sterile 10% Bovine Serum  
534 Albumin (BSA) solution in HBSS without calcium and magnesium and the bacteria group was  
535 fed with the same solution containing 4 x 10<sup>9</sup> bacteria per feeder. Mosquitoes were dissected 6  
536 hours post feeding for visualization of hemocytes attached to the midgut basal surface.

537

#### 538 *Hemocyte collection, morphology staining and quantification*

539 Hemocytes were collected by perfusion using anticoagulant buffer (60% Schneider medium,  
540 30% citrate buffer, pH 4.5 and 10% FBS), pH was adjusted to 7-7.2 after mixing all the  
541 components. After perfusion, hemocytes were placed in a  $\mu$ -slide angiogenesis chamber (ibidi  
542 GmbH, Gräfelfing, Germany) and were allowed to settle for 15 minutes. Cells were fixed for an  
543 hour at room temperature by adding 16% paraformaldehyde (PFA) solution in anticoagulant  
544 buffer to a final concentration of 4%. Following fixation cells were washed with PBS 0.1%  
545 Triton and incubated for 30 minutes at room temperature with 1U of phalloidin (Alexa Fluor  
546 488, Molecular Probes, ThermoFisher Scientific, Waltham, MA, USA) and 20  $\mu$ M Hoechst  
547 33342 (405, Molecular Probes, ThermoFisher Scientific, Waltham, MA, USA), both diluted in  
548 PBS 0.1% Triton. Cells were then placed in mounting media for storage by adding 2 drops of

549 Prolong Gold Antifade Mountant (Molecular Probes, ThermoFisher Scientific, Waltham, MA,  
550 USA). For determination of proportion of megacytes upon Cactus silencing, the hemocytes were  
551 imaged, the diameter of every cell was measured and classified as granulocytes (cell diameter  
552  $>12.5\text{-}25\ \mu\text{m}$ ) or megacytes (cell diameter  $>25\ \mu\text{m}$ ) as mentioned before. The total number of  
553 granulocytes and megacytes obtained from hemolymph pooled from 16-20 mosquitoes was  
554 noted and the percentage of megacytes amongst granulocytes was determined for each sample.  
555 Data from three independent biological replicates were used to plot the graphs.

556

#### 557 *Measurement and categorization of the hemocytes by size*

558 The mosquito hemolymph was collected and the hemocytes were allowed to attach on a coated  
559 well of  $15\ \mu\text{m}$  chamber slide. For each well 8-10 mosquitoes were bled and for every sample,  
560 bleeding was done in two wells with a total of 16-20 mosquitoes. Post attachment, the hemocytes  
561 were fixed with 4% p-formaldehyde and stained with Phalloidin and DAPI to visualize the  
562 morphology. Images were taken for at least 10 random fields for each well and the images were  
563 used to measure the cell diameter using Imaris software. Using the “Pairs” option of  
564 “Measurement points” tool in the software, the largest diameter of every cell was determined.  
565 For categorizing the hemocytes into different subtypes, the following size reference was  
566 followed for every image analysis. Cells with diameter ranging from  $4\text{-}7.5\ \mu\text{m}$  were classified as  
567 prohemocytes,  $>7.5\ \mu\text{m}\text{-}12.5\ \mu\text{m}$  as oenocytoids,  $>12.5\text{-}25\ \mu\text{m}$  as granulocytes and  $>25\ \mu\text{m}$  as  
568 megacytes.

569

#### 570 *dsRNA synthesis*

571 Three-to-four day old female *An.gambiae* females were cold-anesthetized and injected with 69nl  
572 of a 3ug/ul dsCactus or dsLacZ control. Double-stranded RNA for *Cactus* (AGAP007938) was  
573 synthesized by *in vitro* transcription using the MEGAscript RNAi kit (Ambion, ThermoFisher  
574 Scientific, Waltham, MA, USA). DNA templates were obtained by PCR using *An.gambiae*  
575 cDNA extracted from whole body sugar-fed females. A 280-bp fragment was amplified with  
576 primers containing T7 promoters (F-  
577 **TAATACGACTCACTATAGGGTAACACTGCGCTTCATTTGG** and R-  
578 **TAATACGACTCACTATAGGGGCCCTTTTCAATGCTGATGT**), using an annealing  
579 temperature of 58°C. Double-stranded RNA for LacZ was synthesized by amplifying a 218-bp  
580 fragment from LacZ gene clones into pCRII-TOPO vector using M13 primers to generate a  
581 dsRNA control as previously described (Molina-Cruz et al., 2012). **A 386-bp fragment from *RelI***  
582 **gene was amplified using primers containing T7 promoters (F-**  
583 **TAATACGACTCACTATAGGGATCAACAGCACGACGATGAG** and R-  
584 **TAATACGACTCACTATAGGGTCGAAAAGCGCACCTTAAT)** using an annealing  
585 **temperature of 58°C. For double silencing experiments, 138 nl of dsRNA mixture at 3ug/ul was**  
586 **injected into female *Anopheles gambiae*.**

587

#### 588 *RNA extraction and bulk RNAseq library preparation*

589 Hemocytes were collected as previously described above. In short, *An.gambiae* females were  
590 perfused using anticoagulant buffer and immediately transferred to a glass tube for attachment.  
591 After one hour, hemocytes that did not attach to the glass tube were collected and transferred to a  
592 1.5 ml microcentrifuge containing 800ul of TRIZOL LS reagent (Invitrogen, Waltham, MA,  
593 USA), that correspond to the unbound fraction enriched mainly by prohemocytes and

594 oenocytoids. Hemocytes that attached to the glass surface were washed twice with PBS and  
595 resuspended in 1mL of TRIZOL LS reagent (Invitrogen, Waltham, MA, USA), this corresponds  
596 to the bound fraction, mainly enriched by granulocytes. Hemocytes were then lysed in TRIZOL  
597 reagent for 15-30 minutes at room temperature to allow for full dissociation, then stored at 4°C  
598 overnight and then at -20C until RNA extraction. The homogenate of hemocyte samples were  
599 transferred to Phase Lock Gel Heavy 2 mL tubes (QuantaBio, Beverly, MA, USA) that had been  
600 pre-spun for 1500 RCF for 1 minute, and allowed to incubate for 5 minutes at room temperature.  
601 100 uL of chloroform (200 uL per 1 mL TRIZOL or TRIZOL plus media) was added, the tubes  
602 capped, and then vigorously shaken for 15 seconds. Samples were then centrifuged for 12,000  
603 RCF, 10 minutes, 4°C. If the clear, aqueous phase was still mixed with TRIZOL matrix then 100  
604 uL more of chloroform was added, and the samples again mixed vigorously and spun as before.  
605 The aqueous phase was then transferred to a fresh 1.5 mL Eppendorf tube and the RNA  
606 precipitated by adding 0.25 mL of isopropyl alcohol (500 mL per 1 mL TRIZOL reagent used).  
607 20 uL of glycogen (5 mg / mL) were also added to aid in precipitation and pelleting. Samples  
608 were mixed by repeated inversion 10 times, incubated for 10 minutes at room temperature, and  
609 then spun at 12,000 RCF, 10 minutes, 4°C. All the supernatant was removed, and the RNA  
610 pellets washed twice with 75% ethanol (minimum 1 mL of ethanol per 1 mL of TRIZOL used).  
611 Each time the samples were mixed by vortexing and centrifuged 7,500 RCF, 5 minutes, 4C. At  
612 the end, the supernatant was removed and samples air-dried until almost dry, but not completely  
613 (still translucent). RNA was resuspended with 30 uL of RNase free water, pipetting a few times  
614 to homogenize and then incubating at 55°C for 10 minutes to completely resuspend. Samples  
615 were then stored at -20C until library preparation by Bespoke Low-Throughput Team at the  
616 Wellcome Sanger institute. Total RNA quantity was assessed on a Bioanalyser and ranged from

617 300 ng to 39 ng. mRNA was then isolated with the NEBNext Poly(A) mRNA magnetic isolation  
618 module. RNA-seq libraries were prepared from mRNA using the NEBNext Ultra II Directional  
619 RNA Library Prep Kit for Illumina (New England Biolabs) as by manufacturer instructions,  
620 except that a proprietary Sanger UDI (Unique Dual Indexes) adapters / primer system was used.  
621 Furthermore, Kapa Hifi polymerase rather than NEB Q5 was employed. For bulk RNAseq  
622 sequencing samples libraries were run on the Illumina HiSeq 4000 instrument with standard  
623 protocols using a 150-cycle kit set to a 75bp paired-end configuration. Libraries supplied at 2.8  
624 nM and loaded with a loading concentration of 280 pM.

625

#### 626 *Bulk RNA-seq bioinformatic analysis*

627 Sequencing reads in CRAM format were fed into a personal BASH pipeline to convert cram files  
628 to fastq using biobam's bamtofastq program (Version 0.0.191) (Raddi et al., 2020). Forward and  
629 reverse fastq reads in paired mode were aligned to the *A. gambiae* AgamP4.3 reference genome  
630 using hisat2 (Version 2.0.4) and featureCounts (Version 1.5.1) with recommended settings.  
631 Count matrices were combined before downstream data processing and analysis within R version  
632 3.5.3 (RStudio version 1.0.153). Downstream normalization, differential expression analysis and  
633 visualization were done with DESeq2 R package (Version 1.18.1) (Love et al., 2014). Base  
634 factor was defined as the LacZ, unbound condition. Data was normalized by making a scaling  
635 factor for each sample. First the log(e) of all the expression values were taken, then all rows  
636 (genes) were averaged (geometric average). Genes with zero counts in one or more samples were  
637 filtered out and the average log value from log (counts) for all genes was subtracted. Finally, the  
638 median of the ratios calculated as above for each sample was computed and raised to the e to  
639 make the scaling factor. Original read counts were divided by the scaling factor for each sample

640 to get normalized counts. Then, the dispersion for each gene was estimated, and a negative  
641 binomial generalized linear model fitted. P values for the differential expression analysis were  
642 adjusted for multiple testing using the Bonferroni correction. Genes were considered as  
643 differentially expressed in Cactus knockdown compared to LacZ control if they had an adjusted  
644 P value < 0.001 (Wald T-test) and a log<sub>2</sub> fold change > 2. Gene lists with vectorbase IDs were  
645 converted to gene annotations with g:Profiler (Raudvere et al., 2019). g:Profiler utilizes Ensembl  
646 as its primary data source and is anchored to its quarterly release cycle. g:GOSl was used to  
647 perform functional enrichment analysis on input gene lists to map the data onto enriched  
648 biological processes or pathways. In addition to Ensembl, also KEGG, Reactome,  
649 WikiPathways, miRTarBase, and TRANSFAC databases were used. Functional enrichment is  
650 evaluated with a cumulative hypergeometric test with g:SCS (Set Counts and Sizes) multiple  
651 testing correction (adjusted P value reported only < 0.05). Gene lists were ordered on log-fold  
652 changes. Complete dataset is available publicly in  
653 <https://www.ebi.ac.uk/biostudies/arrayexpress/studies/E-MTAB-11252>.

654

### 655 *Transmission Electron Microscopy (TEM)*

656 Hemocytes were collected by perfusion using anticoagulant buffer, described above and they  
657 were allowed to settle on Thermanox™ coverslips (Ted Pella, Redding, CA) for 15 minutes at  
658 room temperature then fixed 2.5% glutaraldehyde in 0.1 M sodium cacodylate buffer overnight  
659 at 4°C, and then post-fixed 1hr with 1.0% osmium tetroxide/0.8% potassium ferricyanide in 0.1  
660 M sodium cacodylate buffer, washed with buffer then stained with 1% tannic acid in dH<sub>2</sub>O for  
661 one hour. After additional buffer washes, the samples were further osmicated with 2% osmium  
662 tetroxide in 0.1M sodium cacodylate for one hour. The samples were then washed with dH<sub>2</sub>O



663 and additionally stained overnight with 1% uranyl acetate at 4°C, dehydrated with a graded  
664 ethanol series, and embedded in Spurr's resin. Thin sections were cut with a Leica UC7  
665 ultramicrotome (Buffalo Grove, IL) prior to viewing at 120 kV on a FEI BT Tecnai transmission  
666 electron microscope (Thermo fisher/FEI, Hillsboro, OR). Digital images were acquired with a  
667 Gatan Rio camera (Gatan, Pleasanton, CA).

668

#### 669 *Mitotracker staining*

670 Hemocytes were perfused with anticoagulant buffer, described above. Cells were incubated at  
671 room temperature for 15 minutes for spreading. Then washed three times with 95% Schneider  
672 media, 5% citrate buffer to remove most of the serum from the cells. Hemocytes were placed  
673 with 200nM Deep Red Mitotracker 644/665 which is retained after fixation (Molecular Probes,  
674 ThermoFisher Scientific, Waltham, MA, USA) diluted in 95% Schneider media, 5% citrate  
675 buffer. Cells were incubated for 45 minutes at room temperature in the dark, then washed with  
676 PBS and fixed with 4% Paraformaldehyde in PBS for 15 minutes at room temperature.  
677 Hemocytes were then counterstained with phalloidin and Hoechst as described above.

678

#### 679 *TM7318 in situ hybridization (ISH)*

680 The ISH protocol includes a permeabilization step with a protease treatment, which compromises  
681 the cell morphology. To evaluate the morphology of hemocytes and RNA expression by ISH, we  
682 used a two-step protocol to image morphology first and then proceed to image the probes,  
683 described in (Raddi et al., 2020). Hemocytes collected by perfusion four days after dsCactus  
684 injection, fixed and stained with Alexa 488 phalloidin (actin) as described above. Ten random  
685 fields of each well were imaged using a tile scan “mark and find” tool, where coordinates of the

686 field are recorded and can be restored to image the same cells later. Then, hemocytes were  
687 subjected to ISH using RNAscope multiplex fluorescent reagent kit v2 assay (cat# 323110,  
688 ACDBio, Abingdon, United Kingdom) following the manufacturer's instructions. TSA based  
689 fluorophores Opal 4- color automation IHC kit (cat # NEL801001KT, PerkinElmer, Waltham,  
690 MA, USA) was used for the development of fluorescence (Opal 620 – C3). A specific RNA  
691 probe for TM7318 (cat# 543201-C3; Aga-Transmembrane-C3) designed by ACDBio was used  
692 to stain specifically megacytes. At the end of the ISH protocol, hemocytes were placed in  
693 prolong gold and re-imaged using the “mark and find” tool to recall the positions of the  
694 morphology pictures. Images were merged using Imaris 9.3.1 (Bitplane, Concord, MA, USA).  
695 Each well was imaged taking 12 fields per well. Post imaging, the cell diameter of every cell was  
696 measured by Phalloidin stain as described previously and the total number of granulocytes were  
697 determined for each sample. Amongst the granulocytes and larger cells (cells with diameter  
698 >12.5), the number of cells positive for the TM7318 probe were counted and their percentage  
699 was determined for both the control and Cactus silencing.

#### 700 *Confocal microscopy and Tile scan imaging*

701 Confocal images were captured using a Leica TCS SP8 (DM8000) confocal microscope (Leica  
702 Microsystems, Wetzlar, Germany) with either a 40x or a 63x oil immersion objective equipped  
703 with a photomultiplier tube/ hybrid detector. Hemocytes were visualized with a white light laser,  
704 using 498-nm excitation for Alexa 488 (phalloidin); 588-nm excitation for Opal620 (TM7318  
705 probe) and Vybrant DiI (hemocytes); 644-nm excitation for Deep Red Mitotracker  
706 (Mitochondria) and a 405-nm diode laser for nuclei staining (Hoechst 33342). Images were taken  
707 using sequential mode and variable z-steps. For combined morphology and in RNA in situ  
708 hybridization, we used tile scan “mark and find” tool included in LASX software to capture the

709 same areas of the slide before and after the hybridization. Image processing and merge was  
710 performed using Imaris 9.3.1 (Bitplane, Concord, MA, USA) and Adobe Photoshop CC (Adobe  
711 Systems, San Jose, CA, USA).

#### 712 *RNA extraction, cDNA synthesis and qPCR analysis*

713 *An. gambiae* hemocytes were collected as described above four days after dsRNA injection  
714 (dsLacZ and dsCactus). Hemolymph pools of 20 mosquitoes (5ul/ each mosquito) were placed  
715 directly into 800ul of TRIzol LS reagent (ThermoFisher Scientific, Waltham, MA, USA). For  
716 midgut RNA extraction, pools of 20 midguts were homogenized directly in 1mL TRIzol reagent.  
717 RNA extraction was carried out as described above in the section *RNA extraction and bulk*  
718 *RNAseq library preparation*. Total extracted RNA was resuspended in nuclease free water and  
719 one microgram was used for cDNA synthesis using the Quantitect reverse transcription kit  
720 (Qiagen, Germantown, MD, USA) following the manufacturer's instructions. Quantitative PCR  
721 (qPCR) was used to measure FBN11228 (AGAP011228), TM7318 (AGAP007318) and FBN50  
722 (AGAP005848) gene expression in hemocytes cDNA. We used the DyNamo SYBR green qPCR  
723 kit (ThermoFisher Scientific, Waltham, MA, USA) with target specific primers and the assay ran  
724 on a CFX96 Real-Time PCR Detection System (Bio-Rad, Hercules, CA, USA). A 139-bp  
725 fragment was amplified for FBN11228 (F- CCAGCATCGGTACAACGGAA and R-  
726 AAGCTCGTGTTCGCTGCTG). A 150-bp fragment was amplified for TM7318 (F-  
727 AAAACATCCAGAAACACGCC and R- GGATTCCGGTTAAGTCCACC). A 92-bp fragment  
728 was amplified for FBN50 (F- ATACAAGGTTCCGGCTATG and R-  
729 CGTTGGTGTAGGTGAGCAGA). Relative expression was normalized against *An. gambiae*  
730 ribosomal protein S7 (RpS7) as internal standard and analyzed using the  $\Delta\Delta$  Ct method (ref –  
731 Livak and Schmittgen, 2001; Pfaffl, 2001). RpS7 (AGAP010592) primers sequences were: F-

732 AGAACCAGCAGACCACCATC and R – GCTGCAAACCTTCGGCTATTC. Statistical analysis  
733 of the fold change was performed using Unpaired t-test (GraphPad, San Diego, CA, USA). Each  
734 independent experiment was performed with three biological replicates (three pools of 20  
735 mosquitoes) for each condition.

### 736 *In vivo live imaging*

737 Mosquitoes were prepared the same way for imaging of perfused hemocytes and injected with  
738 Vybrant DiI cell labelling (ThermoFisher Scientific, Waltham, MA, USA) for both dsCactus and  
739 dsLacZ. After 4 days, mosquitoes were starved in the morning and then fed on a BALB/c mouse  
740 in the afternoon. Imaging took place the next day at 18-20 hours post-bloodmeal. Mosquitoes  
741 were imaged as previously described (Trisnadi and Barillas-Mury, 2020). Briefly, 5-10  
742 mosquitoes with legs and head removed were placed between a coverslip and glass slide with  
743 craft putty as a spacer. Images were taken on a Leica SP5 confocal microscope using a 40x 1.25  
744 NA oil objective with 561 nm (3%) for Vybrant DiI. A z-stack with 1  $\mu$ m intervals was taken to  
745 include hemocytes circulating in the hemolymph to the midgut lumen. The z-stack was taken  
746 every 1 minute for 1-2 hours.

### 747 *Visualizing hemocytes attached to the midgut basal lamina*

748 To preserve hemocyte-midgut bound, midguts were quick fixed using a higher concentration of  
749 fixative injected straight into the hemolymph of the mosquito (207nl of 16% paraformaldehyde).  
750 To stain hemocytes, the day before the dsRNA treatment (dsLacZ and dsCactus), three-to-4-day-  
751 old mosquitoes were injected with 69nl of a 100uM solution Vybrant CM-DiI cell labelling  
752 solution (ThermoFisher Scientific, Waltham, MA, USA), final concentration in the hemolymph  
753 (approximately 3.5uM). Engorged mosquitoes fed with 10% BSA solution containing bacteria  
754 were anesthetized and injected with 207nl of 16% paraformaldehyde, rested 40 seconds before

755 midgut dissection in 4% paraformaldehyde solution. After dissected, midguts were placed in ice-  
756 cold PBS and opened longitudinally, and the bolus was removed. Clean opened tissues were then  
757 fixed overnight at 4°C in 4% paraformaldehyde. The following day, midguts were washed twice  
758 with PBS, blocked for 40 minutes with PBS containing 1% BSA and washed twice with the  
759 same solution. For actin and nuclei staining, midguts were incubated for 30 minutes at room  
760 temperature with 1U of phalloidin (Alexa Fluor 488, Molecular Probes, Waltham, MA, USA)  
761 and 20uM Hoechst 33342 (405, Molecular Probes, Waltham, MA, USA), both diluted in PBS.  
762 Tissues were mounted in microscope slides using Prolong Gold Antifade mounting media  
763 (Molecular Probes, Waltham, MA, USA). Hemocytes were visualized by confocal microscopy  
764 and the number of hemocytes per midgut in each biological condition was also analyzed.

765

#### 766 *PHH3<sup>+</sup> and BrdU staining*

767 For BrdU staining, *An. gambiae* females injected with dsRNA were treated for 3 days with a  
768 sugar solution containing 1mg/ml Bromodeoxyuridine (Sigma Aldrich, St. Louis, MO, USA). At  
769 day four post dsRNA injection, hemocytes were collected with anticoagulant buffer (70%  
770 Schneider media, 30% citrate buffer and 10% FBS) pH 7.4. Hemocytes were allowed to settle on  
771 a ibidi  $\mu$ -Slide 18 Well Glass Bottom slide (Gräfelfing, Germany) for 15 minutes at room  
772 temperature and then fixed for 30 minutes with 4% PFA followed by a permeabilization step  
773 with PBS 0.5% Triton for 20 minutes. Hemocytes were washed twice with PBS with 1% BSA  
774 before treatment with 2N HCL for 40 minutes to denature the DNA. Cells were neutralized with  
775 0.1M Sodium Borate (pH 8.5) for 3 minutes, washed four times with PBS and then blocked with  
776 PBS 2% BSA for 1 hour at room temperature. Cells were then incubated with murine anti-BrdU  
777 antibody monoclonal (1:100; Invitrogen, MoBU-1, stock 0.1mg/ml) in blocking buffer overnight

778 in the cold room. Next day, hemocytes were washed twice with PBS 0.1% Tween 20 and  
779 incubated with Alexa 594 Goat-anti-mouse (1:2000) in blocking buffer for 2 hours at room  
780 temperature. Hemocytes were washed three times with blocking buffer and counterstained with  
781 20  $\mu$ M Hoechst 33342 (405, Molecular Probes, ThermoFisher Scientific, Waltham, MA, USA)  
782 and then mounted by adding 2 drops of Prolong Gold Antifade Mountant (Molecular Probes,  
783 ThermoFisher Scientific, Waltham, MA, USA).

784 For PHH3 staining, hemocytes were collected and fixed as described above. Following fixation,  
785 hemocytes were washed three times with PBS 0.1% triton and then blocked with PBS 2% BSA  
786 and 10% goat serum for 1-2 hours at room temperature. Hemocytes were then incubated with  
787 Anti-phospho-Histone H3 (Ser10) Antibody, Mitosis Marker (1:500, Millipore Sigma, # 06-570)  
788 in blocking buffer overnight in a cold room. Next day, hemocytes were washed with blocking  
789 buffer three times and then placed in a solution containing Alexa 594 goat anti-rabbit (1:2000) in  
790 blocking buffer for 2 hours at room temperature. Hemocytes were washed three times with PBS  
791 0.1% triton and then counter stained with 1U of phalloidin (Alexa Fluor 488, Molecular Probes,  
792 ThermoFisher Scientific, Waltham, MA, USA) and 20  $\mu$ M Hoechst 33342 (405, Molecular  
793 Probes, ThermoFisher Scientific, Waltham, MA, USA), both diluted in PBS 0.1% Triton at room  
794 temperature. Cells were then placed in mounting media for storage by adding 2 drops of Prolong  
795 Gold Antifade Mountant (Molecular Probes, ThermoFisher Scientific, Waltham, MA, USA).

796

### 797 *Oocyst counting in the midgut*

798 *Plasmodium berghei* infections were evaluated by counting oocyst numbers after feeding on an  
799 infected mouse. Infected mosquitoes were kept at 20°C for 10 days after feeding when they were  
800 dissected, and their midgut fixed in 4% PFA for 15 minutes at room temperature. After washing

801 with PBS three times, midguts were mounted in a slide and counted under a fluorescence  
802 microscope, where live oocysts were identified by their GFP expression.

803

804

805

806

807

808

809
